# Supplementary material
Source: Springer Nature journal article supplement (https://www.springermedizin.de/resource/supplementary/13058_2013_3393_MOESM1_ESM.pdf/9704054)

## Baseline

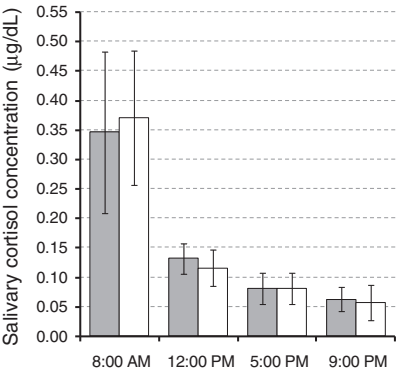

## 6 month follow-up

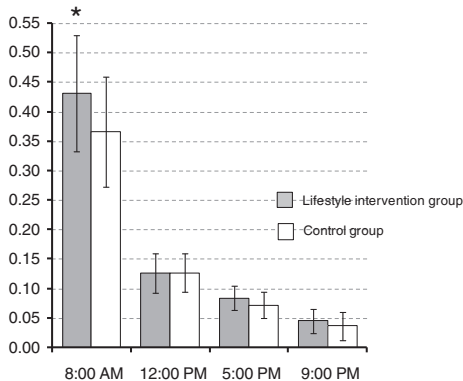

Supplement: MOESM1 [file 9704054]
